# Supplementary material for: Colonoscopic screening is associated with reduced Colorectal Cancer incidence and mortality: a systematic review and meta-analysis
Source: PubMed Central journal article supplement (PMC7477408; doi:10.7150/jca.46661), 2020-08-15
Supplement: jcav11p5953s1.pdf [file jcav11p5953s1.pdf]

Supplementary Table 1. Search Strategy Used in PubMed, June, 2020

| Number | Search Items                                                                                                                                                                                                                                                                                                                                                                                                                                                                                                                                                                                                                                                                                                                                                    | Items Found |
|--------|-----------------------------------------------------------------------------------------------------------------------------------------------------------------------------------------------------------------------------------------------------------------------------------------------------------------------------------------------------------------------------------------------------------------------------------------------------------------------------------------------------------------------------------------------------------------------------------------------------------------------------------------------------------------------------------------------------------------------------------------------------------------|-------------|
| 1      | (((endoscopy [MeSH Terms]) OR endoscopy) OR colonoscopy [MeSH Terms]) OR colonoscopy) OR sigmoidoscopy [MeSH Terms]) OR sigmoidoscopy                                                                                                                                                                                                                                                                                                                                                                                                                                                                                                                                                                                                                           | 391,093     |
| 2      | ((((((((((((("Colorectal Neoplasms"[MeSH Terms]) OR "Colorectal Neoplasms"[Title/Abstract]) OR "Colorectal Neoplasm"[Title/Abstract]) OR "Colorectal Tumors"[Title/Abstract]) OR "Colorectal Tumor"[Title/Abstract]) OR "Colorectal Carcinomas"[Title/Abstract]) OR "Colorectal Carcinoma"[Title/Abstract]) OR "Colorectal Cancers"[Title/Abstract]) OR "Colorectal Cancer"[Title/Abstract]) OR "Intestinal Neoplasms"[Title/Abstract]) OR "Intestinal Neoplasm"[Title/Abstract]) OR "Intestinal Cancers"[Title/Abstract]) OR "Intestinal Cancer"[Title/Abstract]) OR "Gastrointestinal Neoplasms"[Title/Abstract]) OR "Gastrointestinal Neoplasm"[Title/Abstract]) OR "Gastrointestinal Cancers"[Title/Abstract]) OR "Gastrointestinal Cancer"[Title/Abstract] | 238,275     |
| 3      | ((((((((("relative risk") OR "relative risks") OR "odds ratio") OR "odds ratios") OR "rate ratio") OR "rate ratios") OR "risk ratio") OR "risk ratios") OR "hazard ratio") OR "hazard ratios") OR ratio                                                                                                                                                                                                                                                                                                                                                                                                                                                                                                                                                         | 1,187,592   |
| 4      | ((("case-control studies"[MeSH Terms]) OR "cohort studies"[MeSH Terms]) OR cohort) OR "case control"                                                                                                                                                                                                                                                                                                                                                                                                                                                                                                                                                                                                                                                            | 2,460,382   |
| 5      | Numbers 1–4                                                                                                                                                                                                                                                                                                                                                                                                                                                                                                                                                                                                                                                                                                                                                     | 1,572       |

Supplementary Table 2. Search Strategy Used in Embase, June, 2020

| Number | Search Items                                                                                                                                                                                                                                                                                                                                                                                                                                                                                                                                                                                               | Items Found |
|--------|------------------------------------------------------------------------------------------------------------------------------------------------------------------------------------------------------------------------------------------------------------------------------------------------------------------------------------------------------------------------------------------------------------------------------------------------------------------------------------------------------------------------------------------------------------------------------------------------------------|-------------|
| 1      | 'endoscopy'/exp OR 'colonoscopy'/exp OR 'sigmoidoscopy'/exp OR endoscopy OR gastroscopy OR sigmoidoscopy                                                                                                                                                                                                                                                                                                                                                                                                                                                                                                   | 705,137     |
| 2      | 'colorectal neoplasms'/exp OR 'colorectal neoplasms':ti,ab,kw OR 'colorectal neoplasm':ti,ab,kw OR 'colorectal tumors':ti,ab,kw OR 'colorectal tumor':ti,ab,kw OR 'colorectal carcinomas':ti,ab,kw OR 'colorectal carcinoma':ti,ab,kw OR 'colorectal cancers':ti,ab,kw OR 'colorectal cancer':ti,ab,kw OR 'intestinal neoplasms':ti,ab,kw OR 'intestinal neoplasm':ti,ab,kw OR 'intestinal cancers':ti,ab,kw OR 'intestinal cancer':ti,ab,kw OR 'gastrointestinal neoplasms':ti,ab,kw OR 'gastrointestinal neoplasm':ti,ab,kw OR 'gastrointestinal cancers':ti,ab,kw OR 'gastrointestinal cancer':ti,ab,kw | 194,405     |
| 3      | 'risk factor' OR 'relative risks' OR 'odds ratio' OR 'odds ratios' OR 'rate ratio' OR 'rate ratios' OR 'risk ratio' OR 'risk ratios' OR 'hazard ratio' OR 'hazard ratios' OR ratio                                                                                                                                                                                                                                                                                                                                                                                                                         | 2,579,394   |
| 4      | 'cohort analysis'/exp OR 'case control study'/exp OR 'case control' OR cohort                                                                                                                                                                                                                                                                                                                                                                                                                                                                                                                              | 1,226,526   |
| 5      | Numbers 1–4                                                                                                                                                                                                                                                                                                                                                                                                                                                                                                                                                                                                | 1,588       |

Supplementary Table 3. Search Strategy Used in PMC, June, 2020

| Number | Search Items                                                                                                                                                                                                                                                                                                                                                                                                                                                                                                                                                                                                                                                                                                                                                    | Items Found |
|--------|-----------------------------------------------------------------------------------------------------------------------------------------------------------------------------------------------------------------------------------------------------------------------------------------------------------------------------------------------------------------------------------------------------------------------------------------------------------------------------------------------------------------------------------------------------------------------------------------------------------------------------------------------------------------------------------------------------------------------------------------------------------------|-------------|
| 1      | (((endoscopy [MeSH Terms]) OR endoscopy) OR colonoscopy [MeSH Terms]) OR colonoscopy) OR sigmoidoscopy [MeSH Terms]) OR sigmoidoscopy                                                                                                                                                                                                                                                                                                                                                                                                                                                                                                                                                                                                                           | 40,887      |
| 2      | ((((((((((((("Colorectal Neoplasms"[MeSH Terms]) OR "Colorectal Neoplasms"[Title/Abstract]) OR "Colorectal Neoplasm"[Title/Abstract]) OR "Colorectal Tumors"[Title/Abstract]) OR "Colorectal Tumor"[Title/Abstract]) OR "Colorectal Carcinomas"[Title/Abstract]) OR "Colorectal Carcinoma"[Title/Abstract]) OR "Colorectal Cancers"[Title/Abstract]) OR "Colorectal Cancer"[Title/Abstract]) OR "Intestinal Neoplasms"[Title/Abstract]) OR "Intestinal Neoplasm"[Title/Abstract]) OR "Intestinal Cancers"[Title/Abstract]) OR "Intestinal Cancer"[Title/Abstract]) OR "Gastrointestinal Neoplasms"[Title/Abstract]) OR "Gastrointestinal Neoplasm"[Title/Abstract]) OR "Gastrointestinal Cancers"[Title/Abstract]) OR "Gastrointestinal Cancer"[Title/Abstract] | 50,709      |
| 3      | ((((((((("relative risk") OR "relative risks") OR "odds ratio") OR "odds ratios") OR "rate ratio") OR "rate ratios") OR "risk ratio") OR "risk ratios") OR "hazard ratio") OR "hazard ratios") OR ratio                                                                                                                                                                                                                                                                                                                                                                                                                                                                                                                                                         | 290,460     |
| 4      | (((("case-control studies"[MeSH Terms]) OR "cohort studies"[MeSH Terms]) OR cohort) OR "case control"                                                                                                                                                                                                                                                                                                                                                                                                                                                                                                                                                                                                                                                           | 447,923     |
| 5      | Numbers 1–4                                                                                                                                                                                                                                                                                                                                                                                                                                                                                                                                                                                                                                                                                                                                                     | 374         |

Supplementary Table 4: Newcastle-Ottawa Quality Assessments Scale (Newcastle-Ottawa Scale)

| Study                                  | Year | Quality Indicators Form Newcastle-Ottawa Scale |   |   |   |    |   |   |   | Scores |
|----------------------------------------|------|------------------------------------------------|---|---|---|----|---|---|---|--------|
|                                        |      | 1                                              | 2 | 3 | 4 | 5  | 6 | 7 | 8 |        |
| Lee et al, <sup>[35]</sup>             | 2019 | ★                                              | ★ | ★ | ★ | ★★ | ★ | ★ | - | 8      |
| Niikura et al, <sup>[36]</sup>         | 2017 | ★                                              | ★ | ★ | ★ | ★★ | ★ | ★ | - | 8      |
| Wang et al, <sup>[37]</sup>            | 2016 | ★                                              | ★ | ★ | ★ | ★  | ★ | ★ | - | 7      |
| Stock et al, <sup>[38]</sup>           | 2016 | ★                                              | ★ | ★ | ★ | ★  | ★ | ★ | - | 7      |
| Ananthakrishnan et al, <sup>[39]</sup> | 2015 | ★                                              | ★ | ★ | ★ | ★  | ★ | ★ | - | 7      |
| Morois et al, <sup>[41]</sup>          | 2014 | ★                                              | ★ | ★ | ★ | ★  | ★ | ★ | - | 7      |
| Wang et al, <sup>[44]</sup>            | 2013 | ★                                              | ★ | ★ | ★ | ★  | ★ | ★ | - | 7      |
| Nishihara et al, <sup>[8]</sup>        | 2013 | ★                                              | ★ | ★ | ★ | ★  | ★ | ★ | - | 7      |
| Eldridge et al, <sup>[5]</sup>         | 2013 | ★                                              | ★ | ★ | ★ | ★  | ★ | ★ | - | 7      |
| Manser et al, <sup>[46]</sup>          | 2012 | ★                                              | ★ | ★ | ★ | ★  | ★ | ★ | - | 7      |
| Jacob et al, <sup>[47]</sup>           | 2012 | ★                                              | ★ | ★ | ★ | ★  | ★ | - | - | 6      |
| Kahi et al, <sup>[11]</sup>            | 2009 | ★                                              | ★ | ★ | ★ | ★  | ★ | ★ | - | 7      |
| Blom et al, <sup>[49]</sup>            | 2008 | ★                                              | ★ | ★ | ★ | ★  | ★ | ★ | - | 7      |
| Ko et al, <sup>[57]</sup>              | 2019 | ☆                                              | ☆ | ☆ | ☆ | ☆  | ☆ | ☆ | - | 7      |
| Doubeni et al, <sup>[27]</sup>         | 2018 | ☆                                              | ☆ | ☆ | ☆ | ☆  | ☆ | ☆ | - | 7      |
| Kahi et al, <sup>[40]</sup>            | 2014 | ☆                                              | ☆ | ☆ | ☆ | ☆  | ☆ | ☆ | - | 7      |
| Brenner et al, <sup>[42]</sup>         | 2014 | ☆                                              | ☆ | ☆ | ☆ | ☆☆ | ☆ | - | - | 7      |
| Doubeni et al, <sup>[43]</sup>         | 2013 | ☆                                              | ☆ | ☆ | ☆ | ☆  | ☆ | ☆ | - | 7      |
| Schoen et al, <sup>[25]</sup>          | 2012 | ☆                                              | ☆ | ☆ | ☆ | ☆  | ☆ | ☆ | - | 7      |
| Baxter et al, <sup>[10]</sup>          | 2012 | ☆                                              | ☆ | ☆ | ☆ | ☆  | ☆ | ☆ | - | 7      |
| Mulder et al, <sup>[48]</sup>          | 2010 | ☆                                              | ☆ | ☆ | ☆ | ☆  | ☆ | - | - | 6      |
| Cotterchio et al, <sup>[50]</sup>      | 2005 | ☆                                              | ☆ | ☆ | ☆ | ☆  | ☆ | ☆ | - | 7      |
| Newcomb et al, <sup>[51]</sup>         | 2003 | ☆                                              | ☆ | ☆ | ☆ | ☆  | ☆ | ☆ | - | 7      |
| Slattery et al, <sup>[52]</sup>        | 2000 | ☆                                              | ☆ | ☆ | ☆ | ☆☆ | ☆ | ☆ | - | 8      |
| Scheitel et al, <sup>[53]</sup>        | 1999 | ☆                                              | ☆ | ☆ | ☆ | ☆  | ☆ | ☆ | - | 7      |
| Müller et al, <sup>[24]</sup>          | 1995 | ☆                                              | ☆ | ☆ | ☆ | ☆  | ☆ | ☆ | - | 7      |
| Müller et al, <sup>[54]</sup>          | 1995 | ☆                                              | ☆ | ☆ | ☆ | ☆☆ | ☆ | - | - | 7      |
| Selby et al, <sup>[55]</sup>           | 1992 | ☆                                              | ☆ | ☆ | ☆ | ☆  | ☆ | - | - | 6      |
| Newcomb et al, <sup>[56]</sup>         | 1992 | ☆                                              | ☆ | ☆ | ☆ | ☆  | ☆ | ☆ | - | 7      |

★: Cohort Studies; ☆: Case-Control Studies. The first half of the description is the case-control study entry and the second one is cohort study. 1.Representativeness of the exposed cohort/Definition of Cases; 2.Selection of the non-exposed cohort/Representativeness of Cases; 3.Ascertainment of exposure/Selection of Controls; 4.Outcome of interest not present at start of study/Definition of Controls; 5.Control for important factor or additional factor/Comparability; 6.Assessment of outcome/Assessment of exposure; 7.Follow-up long enough for outcomes to occur/Method of Ascertainment; 8.Adequacy of follow up of cohorts/Non-Response Rate.
